# Supplementary material
Source: ML conference proceedings conference paper supplement (https://openaccess.thecvf.com/content/WACV2026/html/Oo_Broadcast2Pitch_Game_State_WACV_2026_paper.html)
Supplement: Supplementary file 1 [file 02664_supp.pdf › 02664_Supp/02664_supp.pdf]

# Broadcast2Pitch: Game State Reconstruction from Unconstrained Soccer Videos

## Supplementary Material

In this supplementary document, we provide further analysis of our framework. Sec. 7 details the ablation study for the IDATR module’s key hyperparameter,  $\tau_{gap}$ . Sec. 8 provides a detailed breakdown of the computational cost of each major module in our proposed GSR framework.

### 7. IDATR Hyperparameters

To assess the sensitivity of the framework to the  $\tau_{gap}$ , we perform an ablation study by varying its value and measuring the resulting GS-HOTA, GS-DetA, GS-AssA, and IDF1 scores in Table 8. The highest performance is observed at  $\tau_{gap} = 25$ , while the lowest score occurs at  $\tau_{gap} = 5$ . Overall, the variation in GS-HOTA across different  $\tau_{gap}$  values remain marginal, indicating that the framework is relatively robust to the choice of  $\tau_{gap}$ . Nonetheless, the results suggest that preserving tracklet continuity—even in the presence of short-term occlusions or missing detections—yields more stable and coherent tracking performance than aggressively fragmenting tracklets.

| $\tau_{gap}$ | GS-HOTA $\uparrow$ | GS-DetA $\uparrow$ | GS-AssA $\uparrow$ | IDF1 $\uparrow$ |
|--------------|--------------------|--------------------|--------------------|-----------------|
| 5            | 60.40              | 47.49              | 76.81              | 63.00           |
| 10           | 61.08              | 48.22              | 77.38              | 63.65           |
| 15           | 61.23              | 48.24              | 77.71              | 63.84           |
| 20           | 61.41              | 48.40              | 77.93              | 64.11           |
| 25           | <b>61.48</b>       | <b>48.47</b>       | 78.00              | <b>64.20</b>    |
| 30           | 61.43              | 48.34              | <b>78.08</b>       | 64.18           |
| 35           | 61.36              | 48.31              | 77.96              | 64.12           |
| 40           | 61.22              | 48.19              | 77.78              | 63.86           |

Table 8. Ablation study on the effect of  $\tau_{gap}$  on IDATR performance in our GSR framework.

### 8. Computational Cost Analysis

Our GSR pipeline consists of five primary modules: (1) detection and tracking, (2) sports field registration via keypoint and line detection and homography estimation, (3) athlete identification using a vision-language model, (4) tracklet refinement (IDATR), and (5) post-processing. Table 9 reports the per-module computational cost in terms of parameter count (Params) and average inference speed (FPS), measured on a single NVIDIA RTX 4090 GPU with a batch size of 1 in inference time.

The primary computational bottleneck in our framework is the Athlete Identification module. To make the

| Module                       | Model                        | Params | FPS    |
|------------------------------|------------------------------|--------|--------|
| Detection<br>Tracking + ReID | YOLOX-X                      | 99.1M  | 12.1   |
|                              | DeepEIoU + OSNet             | 2.2M   |        |
| Sports Field Registration    | EfficientNet-Attention U-Net | 36.9M  | 182    |
| Athlete Identification       | CLIP (ViT-L/14)              | 428.8M | 8.3    |
|                              | LLaMA-3.2-Vision             | 11B    | 1.4    |
| IDATR                        | —                            | —      | 952.4  |
| Post-processing              | —                            | —      | 3225.8 |

Table 9. Computational cost analysis of each module in our Broadcast2Pitch framework (tested on an RTX 4090 GPU).

deployment of the LLaMA-3.2-Vision model feasible on a single NVIDIA RTX 4090 GPU, we leverage the Unsloth library [11] to load the model in a memory-efficient 4-bit quantized format. This optimization is critical for fitting the full pipeline within the 24 GB VRAM limit, enabling state-of-the-art accuracy while remaining compatible with consumer-grade hardware.

Despite this optimization, LLaMA-3.2-Vision runs at only 1.4 FPS, making it suitable for high-accuracy offline analysis. In contrast, CLIP (ViT-L/14) offers a significantly more efficient alternative, running at 8.3 FPS. These results present two practical deployment modes: (1) a high-accuracy offline mode using LLaMA-3.2-Vision for maximum precision in post-match analysis, and (2) a high-throughput analytics mode using CLIP, which offers a strong balance of accuracy and speed for faster processing.
